# Supplementary material for: Trace Elements Analysis of Tunisian and European Extra Virgin Olive Oils by ICP-MS and Chemometrics for Geographical Discrimination
Source: MDPI journal article supplement (doi:10.3390/foods11010082), 2021-12-29
Supplement: s1 [file s1]

## Supplementary material

**Table S1.** ICP-MS operating conditions and measured isotopes.

| Component / Parameter                           | Specification / Value                                                                                                                                                                                                                       |
|-------------------------------------------------|---------------------------------------------------------------------------------------------------------------------------------------------------------------------------------------------------------------------------------------------|
| Plasma gas flow                                 | 9.0 L min <sup>-1</sup>                                                                                                                                                                                                                     |
| Auxiliary gas flow                              | 1.35 L min <sup>-1</sup>                                                                                                                                                                                                                    |
| Nebulizer gas flow                              | 1.11 L min <sup>-1</sup>                                                                                                                                                                                                                    |
| Spray chamber temperature                       | 3 °C                                                                                                                                                                                                                                        |
| RF power                                        | 1400 W                                                                                                                                                                                                                                      |
| Sampling depth                                  | 5.5 mm                                                                                                                                                                                                                                      |
| Dwell time                                      | 30 ms                                                                                                                                                                                                                                       |
| Scans per replicate                             | 20                                                                                                                                                                                                                                          |
| Number replicates per sample                    | 3                                                                                                                                                                                                                                           |
| iCRC gas (flow)                                 | He, H <sub>2</sub> (120 mL min <sup>-1</sup> )                                                                                                                                                                                              |
| Isotopes detected, mode “No Gas”                | <sup>24</sup> Mg, <sup>85</sup> Rb, <sup>88</sup> Sr, <sup>114</sup> Cd, <sup>137</sup> Ba, <sup>208</sup> Pb, <sup>89</sup> Y, <sup>103</sup> Rh and <sup>193</sup> Ir                                                                     |
| Isotopes detected, mode “iCRC, He”              | <sup>51</sup> V, <sup>52</sup> Cr, <sup>55</sup> Mn, <sup>59</sup> Co, <sup>60</sup> Ni, <sup>63</sup> Cu, <sup>65</sup> Cu, <sup>66</sup> Zn, <sup>67</sup> Zn, <sup>68</sup> Zn, <sup>89</sup> Y, <sup>103</sup> Rh and <sup>193</sup> Ir |
| Isotopes detected, mode “iCRC, H <sub>2</sub> ” | <sup>39</sup> K, <sup>44</sup> Ca, <sup>56</sup> Fe, <sup>57</sup> Fe, <sup>75</sup> As, <sup>56</sup> Fe, <sup>89</sup> Y, <sup>103</sup> Rh and <sup>193</sup> Ir                                                                         |

**Table S2.** Limits of detection (LOD). limits of quantification (LOQ), linearity (R<sup>2</sup>) and precision (RSD).

| Elements | LOD (µg kg <sup>-1</sup> ) | LOQ (µg kg <sup>-1</sup> ) | Linearity R <sup>2</sup> | RSD (%) |
|----------|----------------------------|----------------------------|--------------------------|---------|
| As       | 0.004                      | 0.014                      | 0.9997                   | 9–11    |
| Ba       | 0.0003                     | 0.0009                     | 1.0000                   | 4–9     |
| Ca       | 0.227                      | 0.758                      | 0.9998                   | 2–4     |
| Cd       | 0.0002                     | 0.0007                     | 1.0000                   | –       |
| Co       | 0.001                      | 0.002                      | 1.0000                   | 1–2     |
| Cu       | 0.006                      | 0.019                      | 0.9999                   | 9–12    |
| Cr       | 0.035                      | 0.116                      | 1.0000                   | 10–14   |
| Fe       | 0.015                      | 0.049                      | 0.9997                   | 4–9     |
| K        | 0.313                      | 1.042                      | 0.9999                   | 1–2     |
| Mn       | 0.010                      | 0.033                      | 1.0000                   | 7–8     |
| Ni       | 0.003                      | 0.008                      | 0.9998                   | 13–15   |
| Mg       | 0.176                      | 0.588                      | 0.9996                   | 2–6     |
| Rb       | 0.004                      | 0.012                      | 1.0000                   | 1–3     |
| Sr       | 0.001                      | 0.004                      | 1.0000                   | 10–14   |
| Pb       | 0.002                      | 0.006                      | 1.0000                   | 1–2     |
| V        | 0.011                      | 0.037                      | 1.0000                   | 10–15   |
| Zn       | 0.140                      | 0.468                      | 0.9999                   | 6–8     |

**Table S3.** Median values and ranges of concentrations (mg kg<sup>-1</sup>) of trace elements in soils extracts from Tunisia.

| Element | Median value | Minimal – Maximal concentrations |
|---------|--------------|----------------------------------|
| Cd      | 0.01         | [0.003–0.02]                     |
| Pb      | 0.01         | [0.002–0.14]                     |
| Co      | 0.04         | [0.02–0.13]                      |
| Cu      | 0.07         | [0.0004–0.64]                    |
| As      | 0.07         | [0.01–0.25]                      |
| Cr      | 0.14         | [0.03–0.3]                       |
| V       | 0.15         | [0.02–0.59]                      |
| Fe      | 0.25         | [0.04–117]                       |
| Ni      | 0.25         | [0.08–0.51]                      |
| Rb      | 0.39         | [0.17 -0 .84]                    |
| Zn      | 1.86         | [0.3–27.7]                       |
| Mn      | 3.23         | [1.23–9.49]                      |
| Ba      | 21.5         | [7.6–91.5]                       |
| Sr      | 25.6         | [11.4–81.4]                      |
| Mg      | 191          | [104–772]                        |
| K       | 194          | [51.1–551]                       |
| Ca      | 4580         | [3140–5990]                      |
